# Supplementary material
Source: Research Square preprint supplement (doi:10.21203/rs.3.rs-9605569/v2)
Supplement: Supplementary file 1 [file 1e37b667a8cd6b73dd3c3131.docx]

# Section A. Supplementary Description of Broadcast Dispatch Architecture

## A.1 Four Typical Dispatch Scenarios

The dispatch requirements faced by aggregators participating in grid services can be classified into four typical scenarios based on the magnitude and rate of change of the supply–demand ratio’s deviation from equilibrium.

The normal absorption scenario corresponds to stable periods of sustained supply surplus, typically occurring during midday photovoltaic output peaks on clear days, when regional renewable energy generation continuously exceeds load demand. The dispatch objective is to guide the flexible resource fleet to charge at a steady power level, continuously absorbing excess electricity to smooth out positive supply–demand deviations. The normal support scenario corresponds to stable periods of sustained supply deficit, typically occurring during the overlap of evening load peaks and photovoltaic ramp-down. The dispatch objective is to guide the fleet to discharge at a steady power level, filling the negative supply–demand gap. These two scenario types exhibit diurnal periodicity and high predictability, constituting the mainstay of an aggregator’s daily operations.

The emergency absorption scenario corresponds to transient periods of sudden supply surges, typically triggered by abrupt cloud clearing that causes regional photovoltaic output to ramp up sharply within minutes, or by sudden disconnection of large loads that causes the supply–demand ratio to spike. The dispatch objective is to maximise fleet charging power on a minute-level timescale, absorbing the sudden excess supply as rapidly as possible. The emergency support scenario corresponds to transient periods of sudden supply drops or load surges, typically triggered by large-scale cloud-shading events causing photovoltaic output to plummet, or extreme temperatures triggering synchronous air-conditioning load spikes. The dispatch objective is to maximise fleet discharging power on a minute-level timescale, providing emergency power support to the grid. These latter two scenario types are characterised by their suddenness and unpredictability, testing the dispatch system’s extreme response speed and imposing far more stringent requirements on signal transmission latency and device response time than normal scenarios.

The combination of these four scenarios covers the principal spectrum of dispatch requirements in an aggregator’s daily operations, and provides an evaluation framework for the subsequent digital twin simulation — normal scenarios assess aggregation accuracy and steady-state tracking capability, while emergency scenarios assess extreme mobilization capability and power ramp rates.

## A.2 Composition of the Score Value

The aggregator platform compresses multi-source dispatch information into a single scalar score value. This score value comprises two dimensions.

The first dimension is the sign of the score. A positive value indicates the charging direction (corresponding to absorption scenarios, guiding devices to absorb electricity), while a negative value indicates the discharging direction (corresponding to support scenarios, guiding devices to release electricity). The sign is determined by the direction in which the current supply–demand ratio deviates from the equilibrium point.

The second dimension is the absolute value of the score, determined jointly by the supply–demand ratio and the dispatch intensity. The supply–demand ratio reflects the relative relationship between grid supply and load at the current moment; the further it deviates from equilibrium, the larger the absolute value. The dispatch intensity is a dimensionless scaling coefficient set by the aggregator platform; it compresses the platform’s comprehensive assessment of the current scenario — including its forecast of supply–demand trends, its evaluation of dispatch urgency, and the intensity of directives from the grid dispatch authority — into a single numerical value. The dispatch intensity provides the aggregator with a controllable knob: in normal scenarios, the dispatch intensity takes moderate values, yielding a small score absolute value that mobilises only a fraction of devices; in emergency scenarios, the dispatch intensity is pushed to high values, increasing the score absolute value to mobilise as many available devices as possible.

The specific formula for computing the score value and the rules governing dispatch intensity values are given in Methods.

## A.3 Three-Layer Communication Architecture

The system’s communication architecture consists of three physical layers (Fig. 1).

The first layer is the aggregator management platform. Deployed at a ground data centre, the platform is responsible for receiving grid dispatch commands and market signals, computing the score value, and uploading the score value to the satellite via a ground station. The platform also maintains a device registry database and an aggregate response curve model, performing offline calibration and online adaptation. The computational and communication load of the platform is independent of the number of devices — whether it manages one thousand or one million devices, only a single frame of scalar signal needs to be generated and uploaded per dispatch cycle.

The second layer is the low Earth orbit (LEO) communication satellite constellation and its downlink broadcast channel. After the score signal is uplinked through the ground station, the satellite broadcasts it simultaneously to all devices within the coverage area. This study selects LEO satellite constellations as the signal carrier for three reasons: first, satellite beam coverage inherently possesses one-to-many characteristics, with a single broadcast reaching all terminals within the coverage footprint at O(1) communication complexity; second, the LEO orbital altitude (typically 500–1,200 km) corresponds to a one-way propagation delay of approximately 2–4 ms, far below the dispatch cycle (5 minutes), making signal delay negligible from an engineering perspective; third, the satellite link operates independently of terrestrial communication infrastructure, maintaining dispatch continuity in cross-regional deployments, remote area coverage, and extreme disaster scenarios (earthquakes, floods causing terrestrial network outages).

The third layer comprises the urban flexible resource devices. Each device is equipped with a low-cost satellite signal receiving module that continuously monitors the broadcast channel. The receiving module’s function is limited to demodulating the downlink signal and extracting the score value; it possesses no uplink transmission capability and therefore does not constitute a bidirectional communication node.

## A.4 Technical Parameters of the Satellite Broadcast Channel

The data rate of the broadcast signal is extremely low. One 64-bit signal frame is transmitted per dispatch cycle (5 minutes), corresponding to an average data rate of less than 1 bps. This data rate is far below the typical capacity of a LEO satellite L-band downlink channel (tens of kbps to hundreds of kbps), meaning the score signal occupies only a negligible fraction of channel capacity, with the remaining bandwidth available to accommodate frame verification, error-correction coding, and redundant retransmission mechanisms for reliability assurance.

At the receiving end, the satellite signal receiving module has low hardware complexity and cost. Its core consists of an RF chip supporting L-band reception and a small patch antenna, which can be directly integrated onto the battery management system (BMS) circuit board of the energy storage device. The marginal hardware cost can be reduced to the order of a few US dollars under mass production conditions, which is negligible compared to the cost of the device itself. The module requires no independent power supply (powered by the BMS), no independent installation (integrated within the BMS enclosure), and has no perceptible impact on the device’s physical dimensions or installation procedures.

## A.5 Comparison with Terrestrial Broadcast Alternatives

Satellite broadcast is not the only technical pathway for achieving O(1) unidirectional downlink. Terrestrial broadcast alternatives include FM subcarriers (FM-RDS/SCA), Digital Audio Broadcasting (DAB) data channels, and cellular network broadcast modes (such as LTE eMBMS/5G MBS). Each of these approaches has its own advantages and limitations.

FM subcarriers utilise the subchannel of existing FM broadcast infrastructure to transmit low-rate data, offering wide coverage and extremely low receiver chip costs. Their limitations include: constrained available data rates (approximately 1.2 kbps for RDS), coverage dependent on broadcast station transmission power and terrain obstruction, and the need to coordinate frequency resources with multiple broadcast operators for cross-regional deployment. DAB data channels provide higher data rates and stronger multipath resistance, but DAB network deployment coverage globally is far less extensive than FM, and remains unavailable in many developing-country cities. Cellular network broadcast modes (eMBMS/MBS) can leverage existing mobile network infrastructure for regional broadcasting with high coverage density and low latency, but depend on the normal operation of carrier base stations, which may fail simultaneously with terrestrial power infrastructure during large-scale blackouts or natural disasters, and require channel lease fees to be paid to telecommunications operators.

By comparison, satellite broadcast holds systematic advantages in coverage consistency (a single satellite’s footprint can cover areas spanning hundreds to thousands of kilometers in diameter), infrastructure independence (no reliance on terrestrial power grids or communication networks), and cross-regional replicability (the same constellation can serve different countries and regions without location-by-location coordination of frequencies and operators). Its principal disadvantages are weaker indoor penetration compared to terrestrial signals, and the higher initial deployment cost of satellite constellations. However, the former can be mitigated by placing the receiving antenna on top of the device enclosure or near a window (distributed energy storage devices are predominantly deployed on rooftops, in garages, or outdoors, limiting the practical impact of deep-indoor penetration issues), while the latter is being rapidly amortised as commercial LEO constellations (e.g., Starlink, OneWeb, Orbcomm) scale up. This study adopts satellite broadcast as the reference architecture, but the core logic of broadcast dispatch — a unidirectional scalar signal driving statistical population response — is independent of the specific physical-layer carrier and can be adapted to any of the above terrestrial broadcast alternatives.

## A.6 Data Flow Classification

Two fundamentally distinct categories of data flow exist within this architecture and must be strictly differentiated.

The first category is static declaration data during the registration phase. When a device joins the aggregator network, it declares the following parameters to the platform on a one-time basis through a participation agreement: rated energy storage capacity, maximum charging and discharging power, schedulable time window preferences (e.g., participating in dispatch only during nighttime), state-of-charge preference range (e.g., the user wishes to maintain the state of charge between 20% and 90% at all times), and device type identifier (residential storage, commercial storage, electric vehicle, etc.). These parameters fall within the scope of commercial contracts, with update frequencies on the order of days (e.g., seasonal adjustment of schedulable time windows) or even months (e.g., updating rated values after device capacity degradation), and are entirely decoupled from minute-level real-time dispatch. The platform constructs a simulation-based calibration model for the aggregate response curve based on these static parameters.

The second category is dispatch signals during the operational phase. This data flow is strictly unidirectional — from the platform via satellite broadcast downlink to the devices, with no link for devices to upload operational data to the platform. In each 5-minute dispatch cycle, the platform generates a score value, delivers it to all devices via satellite broadcast, and the devices independently make local decisions before executing charging or discharging actions. Throughout the entire dispatch loop, the satellite downlink broadcast constitutes the sole information transmission link.

Furthermore, the uplink data channel required for device metering and settlement exists independently of the dispatch loop. Energy metering data (used for ex-post settlement and revenue allocation) can be uploaded via low-bandwidth, non-real-time communication methods, such as NB-IoT monthly meter reading or periodic WiFi batch upload. The transmission frequency of this uplink channel ranges from hourly to monthly, is not on the critical path of minute-level dispatch, and its latency and reliability do not affect the real-time performance of the dispatch system.

## A.7 Architectural Guarantee of Privacy Protection

Traditional direct dispatch architectures require real-time collection of device-level data (state of charge, charging/discharging power, available capacity), which can reveal sensitive information such as electricity consumption patterns and occupancy status. Even with encrypted transmission and data anonymisation techniques, re-identification risks persist through temporal pattern analysis. The broadcast architecture eliminates these risks at the root: because the dispatch loop contains no uplink channel, no device-level operational data are generated, transmitted, or stored at any point. Privacy protection is therefore not a compliance obligation requiring ongoing technical investment, but an intrinsic structural property of the information-flow topology.

## A.8 Device-Side Local Decision Process

Upon receiving the broadcast score value, each device independently executes the following three steps locally.

**Step 1: Eligibility screening.** The device first determines whether it meets the basic conditions for participating in the current dispatch round. Screening conditions include: whether the device is in normal operating condition (excluding devices under fault or maintenance); whether the current moment falls within the user-declared schedulable time window; and whether the device’s state of charge permits execution of charging or discharging in the direction indicated by the score signal (e.g., if the signal indicates charging, a device whose state of charge has reached the upper limit is ineligible for charging; if the signal indicates discharging, a device whose state of charge has reached the lower limit is ineligible for discharging). Devices that fail the eligibility screening take no dispatch response action in the current round and silently await the next signal frame.

**Step 2: Available capacity calculation.** Devices that pass the eligibility screening calculate their available charging or discharging capacity for the current dispatch cycle. This calculation is based on the device’s current state of charge, rated power, the upper and lower bounds of the user-preferred state-of-charge range, and the duration of the current dispatch cycle. For example, a device with a rated capacity of 10 kWh, a current state of charge of 60%, and a user-preferred upper limit of 90% has an available capacity of 3 kWh in the charging direction, with the maximum sustained charging power jointly constrained by the rated power and the remaining chargeable capacity.

**Step 3: Response decision.** The device autonomously decides whether to participate in the current dispatch round and at what power level, based on the score signal and its own available capacity. The willingness to participate is driven jointly by two factors: first, the dispatch urgency conveyed by the absolute value of the score — the larger the absolute value, the more severe the grid supply–demand deviation or the higher the dispatch intensity, and the more inclined the device is to participate; second, the device’s current state-of-charge headroom — the more ample the headroom (i.e., the further from the state-of-charge boundary), the more readily the device participates, as sufficient margin remains to handle subsequent uncertainty. The formal mathematical definition of the response decision is given in Methods.

The computational complexity of all three steps above is O(1), involving only simple comparisons and arithmetic operations on the device’s local state variables and the broadcast score value, requiring no communication with any external entity and no knowledge of other devices’ states. N devices execute the above decisions in parallel, yielding a global computational complexity of O(N) that is inherently parallel, with no information coupling whatsoever — in fundamental contrast to the combinatorial search space formed by the mutual coupling of N device state variables under the centralised optimisation paradigm.

## A.9 Calibration and Uncertainty Quantification of the Aggregate Response Curve

The aggregate response curve maps each score value to the expected fleet power output. The calibration procedure and neural network architecture are described in the main text Methods; the key architectural details of the dual quantile neural network are summarised in Table S1 below. Two aspects not covered in Methods are noted here. First, because charging and discharging are governed by different physical constraints (SOC headroom versus SOC reserve), separate neural networks are trained for each direction, sharing the same architecture but fitted to direction-specific data. Second, the aggregate curve requires re-calibration when the fleet composition changes materially (e.g., large-scale device additions or retirements). The platform monitors the deviation between predicted and observed substation-level power; when the cumulative deviation exceeds a pre-set threshold, a re-calibration cycle is triggered using the updated registration database. Between re-calibrations, the conformal prediction intervals remain valid under the exchangeability assumption, which holds as long as the device population is statistically stationary.

*Table S1. Quantile neural network architecture and training configuration*

| **Component** | **Specification** |
| --- | --- |
| Architecture | Fully connected feedforward, 3 hidden layers (128–64–32) |
| Activation | ReLU |
| Dropout | 0.15 after each hidden layer |
| Input features | 10: signal intensity, supply–demand code, region ID, priority level, intensity × direction interaction, direction indicator, sinusoidal hour encoding (sin, cos), peak-hour flag, weekend flag |
| Output | 3 conditional quantiles () |
| Loss function | Huber quantile loss () |
| Optimiser | AdamW (lr , weight decay ) |
| Batch size | 32 |
| Max epochs | 150 |
| Early stopping | Patience 40 epochs, monitored on calibration-set loss |
| Data split | 70% training / 30% calibration (CQR) |

# Section B. Detailed Analysis of Signal Determinism in Aggregate Response

This section provides the complete experimental setup, statistical analysis procedures, and itemised numerical results for the main text section “Aggregate response of large-scale urban distributed energy storage exhibits signal determinism.”

## B.1 Simulation Setup and Experimental Objectives

The digital twin simulation system comprises 5,000 heterogeneous distributed energy storage devices, with device parameters spanning rated capacities of 5–20 kWh and initial states of charge (SOC) heterogeneously distributed over 20%–90%, calibrated against publicly available field measurement data (details of parameter sampling and calibration are given in Methods). Four dispatch scenario types (normal absorption, normal support, emergency absorption, emergency support) each undergo 30 independent simulation runs, with device initial states and behavioural parameters independently resampled in each run. Throughout the experiments, the dispatch centre has no access to any individual device’s state of charge, charge–discharge trajectory, or user behaviour information, and relies solely on the broadcast score value for aggregate response prediction.

The positioning of the experiments in this section warrants clarification. By the law of large numbers, when a large number of conditionally independent devices respond to the same signal, individual stochasticity attenuates at a rate of through aggregation, and the aggregate power converges towards its expected value. The objective of these experiments is not to re-verify this mathematical fact, but rather to confirm whether it holds within the specific engineering parameter space of distributed energy storage dispatch — heterogeneous capacity distributions, stochastic initial states of charge, and multi-scenario switching — and to what precision. In other words, the experiments address the question: within realistic energy storage device parameter ranges, is aggregation at the scale of 5,000 devices sufficient to suppress individual stochasticity such that the aggregate response can be treated as a deterministic function of the score value?

## B.2 Hierarchical Regression and Variance Decomposition

The main text reports a cross-scenario pooled but notes that this value requires careful interpretation. This section presents the complete variance decomposition procedure.

The hierarchical regression analysis introduces explanatory variables sequentially. The first tier includes only the supply–demand ratio, which explains 86.9% of the total variance. The high explanatory power of the supply–demand ratio arises primarily from mean differences between charge and discharge directions: the mean aggregate power for charging and discharging scenarios differs in sign and magnitude, such that directional partitioning alone captures the majority of cross-scenario variation. This implies that approximately 87% of the cross-scenario pooled is attributable to between-scenario mean differences, with only approximately 13% reflecting within-scenario prediction accuracy driven by variation in signal intensity. In the second tier, adding the dispatch intensity variable to the supply–demand ratio raises to above 0.99, with an incremental contribution of approximately 13.2%, corresponding to the capacity of signal intensity to finely modulate aggregate power within a given direction. The third tier further incorporates temporal variables (simulation time step, run index) and contextual variables (scenario switching flag), which collectively contribute less than 0.1%.

These results carry direct architectural implications. The direction and intensity dimensions of the signal account for virtually all variance in the aggregate response, while temporal dependence and contextual effects are statistically negligible. This confirms the core design assumption of the broadcast dispatch architecture: the dispatch centre need not collect any state feedback from the device side and can achieve effective control of the aggregate response solely by designing the direction and intensity of the broadcast signal. Accordingly, the main text adopts the per-scenario independent values (0.94–0.98) as the core metric for evaluating broadcast dispatch prediction capability, with the cross-scenario pooled value serving only as a supplementary reference.

## B.3 Per-Scenario Prediction Accuracy Analysis

The 30-run independent statistics for the four scenario types are as follows. Normal support: (95% CI [0.940, 0.942]); normal absorption: (95% CI [0.946, 0.948]); emergency support: (95% CI [0.980, 0.981]); emergency absorption: (95% CI [0.969, 0.970]). These confidence intervals are conditional on the current simulation parameter configuration (, uniform SOC initial distribution) and reflect the sampling variability across 30 independent runs, not generalisability to different device scales or SOC distributions.

The systematically higher in emergency scenarios (0.969–0.980) compared to normal scenarios (0.941–0.947) admits a physical explanation: under emergency scenarios, dispatch intensity is large and the signal-driven force dominates the stochastic perturbation from individual device heterogeneity, yielding a higher signal-to-noise ratio and thus tighter tracking of the aggregate response to the signal. Under normal scenarios, dispatch intensity is moderate, the relative contribution of inter-device heterogeneity and individual stochastic behaviour to the aggregate outcome is larger, resulting in slightly lower but still above-0.94 values.

The corresponding SMAPE metric exhibits an inverse scenario differentiation: normal scenarios have lower SMAPE (routine support 7.3%, routine absorption 9.0%), while emergency scenarios have substantially higher SMAPE (emergency support 16.3%, emergency absorption 18.8%). The apparent contradiction of high coexisting with high SMAPE requires explanation in the following section.

## B.4 Analysis of SMAPE Scenario Differentiation

The observation that emergency scenarios exhibit higher than normal scenarios yet also higher SMAPE reflects an apparent contradiction between the two metrics that arises from the mathematical amplification effect of SMAPE as a percentage-based measure in low-power regions.

The physical characteristic of emergency scenarios is that the supply–demand state undergoes rapid changes over short periods, requiring the aggregate response to switch quickly between charging and discharging. During these transitions, the aggregate power necessarily passes through a transition zone near zero. Statistical analysis reveals that approximately 16% of time steps in emergency scenarios fall within such low-power transition zones (aggregate power absolute value below 2 MW). At these time steps, the mean absolute prediction error is 316 kW, representing only 1.0% of the total rated capacity of the fleet, comparable in magnitude to the mean absolute error at high-power time steps (245 kW). However, the denominator of SMAPE is half the sum of the absolute values of the predicted and actual values; as the denominator approaches zero, even small absolute errors are drastically amplified in percentage terms. The mean SMAPE at low-power time steps reaches 77.5%, far exceeding the 5%–8% level at high-power time steps, thereby inflating the overall SMAPE average for emergency scenarios.

After excluding low-power transition time steps, the SMAPE for emergency scenarios drops to 6%–8%, comparable to that of normal scenarios. This result confirms that the absolute prediction accuracy of broadcast dispatch is consistent across all scenarios, and the SMAPE scenario differentiation reported in the main text is a mathematical amplification artifact of the percentage-based measure in low-power regions, rather than a systematic accuracy degradation inherent to the broadcast dispatch architecture under emergency scenarios. For engineering practice, the absolute power deviation in low-power transition zones is negligibly small and has minimal impact on grid balancing.

## B.5 Prediction Interval and Coverage Analysis

For practical grid dispatch, point predictions (means) alone are insufficient. The dispatch centre also needs to know the uncertainty bounds of predictions, so as to configure spinning reserve capacity or determine the call margin for interruptible loads. To this end, this study employs conformal quantile regression (CQR) to construct distribution-free prediction intervals for each time step.

The key advantage of conformal quantile regression is that it does not rely on distributional assumptions about the aggregate response. Conventional parametric prediction intervals (e.g., under a Gaussian assumption) may fail severely when the response distribution is skewed or heavy-tailed. The conformal approach requires only exchangeability of the data, under which it provides finite-sample coverage guarantees: for a nominal level , the actual coverage probability is no less than .

The open-loop coverage reported in the main text (90.8%; PINAW 3.2%) assumes randomly sequenced score signals satisfying exchangeability. Closed-loop dispatch introduces adaptive signal selection, raising the question of whether coverage degrades. We re-evaluated the 24 hourly signals selected by the curtailment optimiser in Result 2, each against M = 20 independently initialised device populations with initial SOC resampled per replicate. The closed-loop coverage is 93.8%, exceeding the 90% nominal level and confirming that adaptive signal selection does not compromise the CQR guarantee.

## B.6 Residual Analysis

Prediction residuals (actual aggregate power minus model-predicted values) are subjected to systematic testing to assess whether the model exhibits systematic bias.

The residual mean test shows that residual means for all four scenario types are approximately zero, with no statistically significant systematic bias detected. This rules out the following risk: the model systematically overestimates or underestimates the aggregate response under a particular scenario, causing the dispatch centre to persistently over-dispatch or under-dispatch in that scenario. Time-series autocorrelation analysis of the residuals reveals no significant lagged correlation structure, indicating that the model has not omitted important temporal dynamic features. The scatter distribution of residuals against score values is approximately uniform, exhibiting no heteroscedastic pattern (i.e., prediction accuracy does not systematically vary with signal intensity). These tests collectively demonstrate that the dual quantile neural network achieves adequate fitting of the aggregate response curve within the current simulation parameter space, with residuals approximating white noise.

## B.7 Model Mismatch Sensitivity Analysis

No engineering system can precisely characterise all device parameters. Rated capacities and SOC preferences declared by devices at registration may deviate from actual operating values; some devices may temporarily go offline due to faults, user disconnection, or communication interruptions; and actual device response probabilities may diverge from declared values at registration owing to firmware differences or changes in user behaviour. Consequently, the robustness of the dispatch architecture to model mismatch directly determines its deployment prospects in real-world environments.

This study designs sensitivity experiments for three categories of typical mismatch factors (Fig. 4a), comprising two stages: single-factor perturbation and multi-factor joint perturbation.

In the single-factor perturbation experiments, only one mismatch factor is varied at a time while all others remain at baseline. The first category is SOC estimation noise: zero-mean Gaussian noise with standard deviations increasing from 5% to 30% is added to the true initial SOC of each device. Results show that even when SOC noise reaches 30% (i.e., the typical deviation between a device’s actual SOC and the platform model’s assumed value is ±30 percentage points), the cross-scenario pooled remains at 0.997. SOC noise has minimal impact on aggregate accuracy; the physical reason is that SOC noise alters each individual device’s available capacity window, but upon aggregation over a large number of devices, positive and negative deviations approximately cancel, with the aggregation effect naturally suppressing such symmetric noise. The second category is device offline rate: at each time step, a certain proportion of devices are randomly selected and marked as offline (unresponsive to any signal), with offline rates increasing from 2% to 15%. At 15% offline rate, — the accuracy degradation is perceptible but remains within an engineering-acceptable range. The mechanism of offline impact is the systematic reduction of the effective number of participating devices, equivalent to shrinking , causing aggregate convergence accuracy to degrade slightly with . The third category is response probability bias: the actual response probability of all devices is uniformly shifted relative to the model-assumed value, with the shift ranging from to . Within the deviation range, consistently exceeds 0.93. Response probability bias has a larger impact than the first two categories because it produces a systematic shift in the mean of the aggregate power (rather than merely increasing variance), causing persistent bias in the model’s point predictions.

The multi-factor joint perturbation experiments examine the extreme case where all three mismatch types are superimposed simultaneously. The experimental design includes two directional groups: positive superposition and negative superposition. Under positive superposition bias, the actual device response probability exceeds the model-assumed value (+30%) while 15% of devices are offline. The elevated response probability means that online devices participate more actively, partially compensating for the reduction in effective participation caused by offline devices — the two effects partially offset, and still reaches 0.983. Under negative superposition bias, response probability falls below the model-assumed value while device offline further compounds, with both effects synergistically weakening the effective number of participating devices and individual response strength. Three gradient levels from mild to severe are configured, yielding values of 0.978, 0.872, and 0.602, respectively, exhibiting gradual degradation rather than abrupt failure.

The gradual degradation characteristic is critically important for engineering deployment. Abrupt failure implies that system performance collapses sharply at some parameter threshold, making it difficult for the dispatch centre to issue early warnings; gradual degradation means that performance declines smoothly with parameter estimation error, with aggregate response deviation increasing linearly to quadratically with the degree of mismatch. The dispatch centre can continuously monitor the deviation trend between actual aggregate power and model predictions, promptly identifying parameter drift and triggering model recalibration or online adaptation mechanisms (see Methods), without concern that the system might suddenly lose control at some undetected critical point. Even under the most extreme negative superposition severe mismatch (), the aggregate response retains a positive correlation with the signal — the dispatch direction does not reverse — and the system operates in a “reduced accuracy but correct direction” degraded mode rather than complete failure.

# Section C. Theoretical Derivation, Simulation Validation, and Sensitivity Analysis of Aggregation Convergence Properties

This section provides the complete theoretical derivation, simulation configuration details, statistical testing procedures, and sensitivity analysis results for the section “Minimum device scale required for engineering-grade accuracy and its robustness to heterogeneity” in the main text.

## C.1 Theoretical Derivation of the Coefficient of Variation of Aggregate Power

Consider distributed energy storage devices under the jurisdiction of an aggregator. The response power of the -th device upon receiving a scalar scoring signal is a random variable . Under the broadcast dispatch architecture, all devices receive the identical signal and independently make charging/discharging decisions based on their local state of charge (SOC), rated capacity, power constraints, and response willingness. The aggregate power is defined as

(S1)

Since each device’s response decision depends only on the broadcast signal and its own local state, are conditionally independent random variables given . Note that this independence is conditional — conditioned on the common broadcast signal . Unconditionally, all device responses are correlated through the common cause , but since dispatch analysis is always conducted conditional on a given , conditional independence is the appropriate assumption.

The expectation and variance of the aggregate power are, respectively,

(S2)

(S3)

where the additivity of variance follows directly from the conditional independence assumption. If the device population is drawn from a common parametric distribution (i.e., identically distributed in the statistical sense, despite differing specific parameter values), the conditional expectation and conditional variance of an individual device’s response power can be defined as and , yielding and . The coefficient of variation (CV) of the aggregate power is defined as the ratio of the standard deviation to the expectation:

(S4)

Defining the effective coefficient of variation of an individual device as , the aggregate CV simplifies to . This expression indicates that the relative fluctuation of aggregate power decays at a rate of . The effective coefficient of variation characterises the dispersion of individual device response power relative to its mean, determined jointly by the parametric distribution of the device population (rated capacity distribution, SOC distribution, functional form of the response probability) and the current signal value , but independent of the total number of devices .

In practice, varies with . To obtain a summary metric independent of any specific signal value, we take the median of across all experimental signal values as the representative value, denoted (with the dependence on suppressed hereafter).

It should be noted that the above derivation remains valid when devices are non-identically distributed; one simply retains the summation form without applying the homogeneity simplification. In that case,

(S5)

When devices are heterogeneous in parameters but no single device dominates the aggregate variance (i.e., the Lindeberg condition is satisfied), the above expression still decays at the rate.

## C.2 Simulation Parameter Configuration and Measurement of the Effective Coefficient of Variation

The parameter configuration of the 5,000 devices in the digital twin simulation system is as follows.

The rated capacity follows a continuous uniform distribution on the interval kWh, i.e., . This range encompasses the mainstream specifications of commercially available residential energy storage products (rated capacities of residential storage systems are predominantly concentrated in the 3–20 kWh range, e.g., Tesla Powerwall 13.5 kWh, BYD HVS 5.1–12.8 kWh, Enphase IQ 3.36–10.08 kWh), with margins at both ends to accommodate small commercial and industrial scenarios.

The operating range of the state of charge (SOC) is drawn per device from , meaning devices are dispatchable only when SOC is between 20% and 90%. This is a widely adopted constraint for lithium-ion batteries during daily cycling to preserve cycle life. Each device’s actual SOC at each dispatch instant is determined by its historical charge/discharge trajectory, with the initial SOC uniformly distributed within the available range.

The response decision of each individual device is modelled as a Bernoulli process. After passing the eligibility screening, a device participates in the response with probability :

(S6)

where is the absolute value of the scoring signal, and is the SOC weighting function reflecting the device’s willingness to respond at its current state of charge. For the charging direction (), a lower SOC implies greater willingness to charge:

(S7)

For the discharging direction (), a higher SOC implies greater willingness to discharge:

(S8)

A device that decides to participate responds at a fraction of its rated power, with the output fraction likewise modulated by the SOC margin. Devices that fail the eligibility screening (SOC out of bounds or device in a non-dispatchable period) contribute zero response power for that interval.

Under the above parameter configuration, the conditional response power of an individual device follows a mixture distribution: with probability it takes the value zero (non-response), and with probability it takes a positive value jointly determined by the rated capacity and SOC margin. The variance of this mixture distribution comprises two components — the Bernoulli variance of participation versus non-participation, and the variance of the output magnitude conditional on participation.

The measurement procedure for the effective coefficient of variation is as follows. For a given signal value , response power is independently sampled for each of the 5,000 devices, and the sample mean and sample standard deviation of individual device power are computed, yielding . This calculation is repeated across all 41 signal levels from to in increments of 0.05, and the median is taken to obtain . This value implies that, at typical signal intensities, the standard deviation of individual device response power is approximately 18% of its mean.

## C.3 Determination of the Minimum Device Count Threshold and Bootstrap Confidence Intervals

The quantitative criterion for engineering-grade accuracy is the coefficient of determination , defined as the proportion of the measured variance in aggregate power explained by the aggregate response curve model. This study adopts as the threshold for “engineering-grade”, meaning the model explains at least 95% of the aggregate power variance and the residual variance does not exceed 5% of the total variance.

The minimum device count threshold is defined as the smallest number of devices at which first stably exceeds 0.95. The determination procedure is as follows. The device count is varied over the set . For each device count level , devices are sampled without replacement from the pool of 5,000 to form a sub-population, and simulations are conducted under all four dispatch scenario categories to compute . Each level is repeated for 30 independent trials to capture the randomness of device sampling.

The bootstrap confidence interval for is constructed as follows. For the 30 observed values at each level, the mean and 95% confidence interval of are estimated via non-parametric bootstrap (10,000 resamples). Subsequently, for each bootstrap sample, the value at which first exceeds 0.95 is identified, yielding a bootstrap distribution of . The 2.5th and 97.5th percentiles of this distribution constitute the 95% confidence interval. Under the default parameter configuration (capacity CV = 0.39, corresponding to ), the bootstrap 95% CI for is [100, 200], with a point estimate of 150.

The theoretical formula from Section C.1 can be used for cross-validation. Setting the target aggregate CV as , from we obtain

(S9)

The target corresponds to a residual variance fraction of no more than 5%, which in the signal–response model of this study approximately translates to an aggregate CV not exceeding – (the exact value depending on the dynamic range spanned by the signal). Taking and yields , which is in excellent agreement with the simulation-measured value of 150, demonstrating the strong predictive capability of the theoretical formula.

This formula simultaneously reveals the parametric dependence of the threshold: is proportional to the variance of individual device response and inversely proportional to the square of the mean. Greater capacity variance or higher dispersion in response probability leads to a larger and consequently a higher required device count. Conversely, a more homogeneous device population or more concentrated response probability reduces and lowers the threshold accordingly.

It can also be observed in Fig. 2b that accuracy does not saturate beyond but continues to improve: exceeds 0.98 beyond approximately 1,000 devices, stabilising in the 0.98–0.99 range at 1,500–5,000 devices. This is consistent with the continued decay of — doubling the device count reduces the aggregate CV by approximately 29%. Conversely, below , drops sharply: to approximately 0.88 at 50 devices and approximately 0.72 at 10 devices, indicating that individual-level randomness cannot be sufficiently cancelled in small-scale populations, and aggregate power ceases to be a predictable function of the scoring signal.

## C.4 Empirical Verification of the Device Independence Assumption

The core premise of the derivation in Section C.1 is conditional independence among devices. If positive cross-sectional correlations exist among device responses (e.g., behavioural synchronization induced by sharing the same electricity price signal), the aggregate variance would exceed the prediction under independence, the decay law would no longer hold, and the actual convergence would be slower than theoretically expected. Conversely, negative correlations would lead to faster-than-expected convergence. Therefore, verifying whether the actual slope of the decay law equals −0.50 constitutes a direct test of the independence assumption.

The testing procedure is as follows. At five device count levels , 30 independent simulation trials are conducted at each level, and the empirical coefficient of variation of the aggregate power across all signal values is computed for each trial. Ordinary least squares (OLS) regression of on is then performed in log–log coordinates:

(S10)

Under the independence assumption, the theoretical prediction is .

The empirical result is: the OLS estimate , with a 95% confidence interval of , which contains the theoretical value of −0.50. The regression , indicating an excellent fit to the power-law relationship. Residual analysis revealed no significant nonlinear patterns or heteroscedasticity.

The implications of this result warrant careful articulation. The decay is a mathematical consequence of aggregating conditionally independent random variables (the law of large numbers), and does not itself require experimental verification. The true purpose of this test is to confirm that, in the distributed energy storage dispatch scenario modelled in this study, no significant cross-sectional dependence exists among devices, thereby ruling out departures from the expected convergence rate that would arise if the independence assumption were violated.

# Section D. Closed-Loop Curtailment Reduction via Broadcast Dispatch, Benchmark Strategy Analysis, and Cross-Regional Transfer Validation

## D.1 Scenario Configuration and Dispatch Mechanism for Closed-Loop Curtailment Reduction

The closed-loop curtailment reduction experiment selects a representative day with a solar-to-load ratio of 1.1 as the benchmark test scenario. During daytime hours on this day, the total supply-side output persistently exceeds the base load, with a peak excess power of approximately 4.05 MW and the excess period concentrated between 09:00 and 15:00. The base load is set at 11.25 MW, corresponding to the typical daytime load level of a medium-scale urban distribution network.

The operational workflow of the closed-loop dispatch proceeds as follows. The dispatch centre generates a scoring signal frame every 5 minutes, which is uplinked to a low Earth orbit (LEO) communication satellite via the ground station and broadcast to all 5,000 energy storage devices. Upon signal reception, each device autonomously executes eligibility screening and response decisions based on the broadcast scoring value and its local state of charge (the formal definition of the decision rules is provided in Methods). During excess periods, the scoring signal guides the device fleet to charge for absorption; during evening peak periods, the signal reverses direction to guide fleet discharge for grid support. The entire process requires no device-to-centre communication whatsoever — the dispatch centre knows neither which devices responded to the signal nor the current state of charge, charging/discharging behaviour, or available capacity of any individual device. Dispatch capability derives entirely from the scoring signal–aggregate response mapping established in Results 1–2 of the main text: the platform predicts the fleet’s total response power based on the offline-calibrated aggregate curve and solves for the optimal scoring value that yields a prediction closest to the dispatch target via a closed-loop optimiser. Following dispatch, the excess energy on this day is effectively absorbed by the storage fleet, achieving a curtailment reduction rate of 98.9% (Fig. 3a).

## D.2 Scaling Relationship Between Reduction Rate and Device Population Size

To disentangle the respective contributions of dispatch prediction accuracy and total available fleet charging capacity to the reduction rate, the grid scale is held constant (11.25 MW base load, solar-to-load ratio 1.1) while only the number of connected storage devices is varied across a series of simulations. A closed-loop optimiser is independently trained for each value of N, to preclude any cross-scale parameter sharing from influencing the results. The reduction rates at each scale point are as follows: 2.5% at N = 50, 9.7% at N = 200, 20.9% at N = 500, 40.6% at N = 1,000, 69.3% at N = 2,000, and 98.7% at N = 5,000 (all values are multi-run means, with 95% confidence intervals of ±0.2% to ±0.5%). The minor discrepancy between the 98.7% reduction rate at N = 5,000 in Fig. 3c and the 98.9% reported in Section D.1 arises from differences in random seeds and statistical fluctuation due to multi-run averaging; the two values are consistent within their confidence intervals.

The above data exhibit an approximately linear growth trend until the total fleet capacity approaches the cumulative daytime excess energy, at which point a saturation plateau emerges. This linear relationship indicates that, prior to capacity saturation, the bottleneck for reduction rate is the fleet’s total physical capacity rather than dispatch accuracy — the predictive accuracy of broadcast dispatch under the current model is no longer a binding constraint. This finding has direct implications for engineering deployment planning: given that the daytime excess power profile of a grid is known, the number of devices required to achieve a target reduction rate is primarily determined by the capacity matching relationship — specifically, by dividing the total excess energy by the average available charging capacity per device. The established in Result 1 of the main text represents only the minimum threshold for dispatch accuracy convergence, i.e., the minimum number of devices required to ensure that the statistical fluctuation of aggregate response is sufficiently small. Actual deployment scales are typically far above this threshold, driven by capacity matching requirements rather than accuracy requirements.

## D.3 Sensitivity of Broadcast Dispatch to Renewable Energy Penetration Levels

To comprehensively evaluate the robustness of dispatch effectiveness to variations in renewable energy penetration, three independent replicate simulations are conducted under each of six solar-to-load ratio conditions — 0.8, 0.95, 1.1, 1.3, 1.5, and 2.0 — with the device count fixed at 5,000. The baseline curtailment (total curtailed energy absent any dispatch intervention), post-dispatch residual curtailment, and corresponding reduction rates under each condition are as follows.

At a solar-to-load ratio of 0.8, the baseline curtailment is 0.99 MWh, the excess magnitude is modest, and broadcast dispatch achieves a reduction rate of 100.0%, with residual curtailment reduced to zero. At a ratio of 0.95, the baseline curtailment increases to 7.42 MWh, dispatch achieves 100% reduction, and the total fleet capacity remains sufficient to fully absorb all excess energy. At a ratio of 1.1 (i.e., the benchmark scenario of Section D.1), the baseline curtailment is 16.0 MWh, post-dispatch residual curtailment drops to 0.18 MWh, yielding a reduction rate of 98.9%. At a ratio of 1.3, the baseline curtailment rises to 29.43 MWh, the excess begins to exceed the coverage range of total fleet capacity, post-dispatch residual curtailment is 5.43 MWh, and the reduction rate is 81.5%. At a ratio of 1.5, the baseline curtailment is 43.71 MWh, residual curtailment is 15.55 MWh, and the reduction rate is 64.4%. At a ratio of 2.0, the excess far exceeds fleet capacity, with baseline curtailment of 82.07 MWh, residual curtailment of 54.79 MWh, and a reduction rate still reaching 33.2%.

The decline trajectory of the reduction rate with increasing solar-to-load ratio is smooth and predictable (Fig. 3d), exhibiting no abrupt transitions or threshold effects. At all penetration levels, broadcast dispatch significantly outperforms the uncoordinated baseline. The engineering implication of this result is that the effectiveness of broadcast dispatch is not confined to a specific penetration rate window but provides sustained and quantifiable curtailment reduction benefits across a wide range. The upper bound of the reduction rate is determined by the ratio of total available fleet charging capacity to daytime excess energy — when this ratio exceeds unity, near-100% reduction is achievable; when it falls below unity, the reduction rate approximately equals the ratio itself. This parsimonious capacity matching relationship enables operators to estimate the expected reduction performance at a given penetration level through simple capacity accounting prior to deployment, without running full simulations.

## D.4 Design and Quantitative Comparison of Benchmark Strategies

To contextualise the reduction rate of broadcast dispatch within a comparable reference frame, three benchmark strategies are additionally evaluated under the solar-to-load ratio of 1.1, spanning the spectrum from zero communication to perfect communication.

The first benchmark strategy is the uncoordinated baseline. Under this condition, all 5,000 devices do not respond to any dispatch signal and operate according to their respective default charging/discharging behaviours. This baseline corresponds to a curtailment reduction rate of 0% with all excess power curtailed, serving as the zero-point reference for evaluating the incremental value of all other strategies.

The second benchmark strategy is the local SOC threshold rule. Each device makes decisions solely based on its local clock and its own state of charge (SOC), requiring no external communication: during daytime hours (determined by the local clock), charging proceeds until SOC reaches 0.8 and then ceases; during evening hours, discharging proceeds until SOC drops to 0.3 and then ceases. The communication cost of this strategy is zero, achieving a curtailment reduction rate of 37.4% ± 0.2%. Its performance bottleneck lies in the fixed thresholds causing devices to cease charging before the solar peak arrives — since most devices’ rated power is sufficient to charge SOC from its initial level to the 0.8 upper threshold within approximately 30 minutes, devices become idle by mid-morning and are unable to continue absorbing peak excess power during the 11:00–14:00 period. This temporal mismatch is the fundamental deficiency of fixed-threshold strategies: they lack awareness of the grid’s real-time supply–demand state and cannot adapt charging behaviour to the time-varying characteristics of excess power.

The third benchmark strategy is the centralised greedy upper bound. This strategy assumes the dispatch centre has complete real-time knowledge of the state of charge, available power, and constraints of all 5,000 devices, issuing optimal charge/discharge commands to each device individually via O(N) communication. Under idealised conditions (zero communication latency, zero power delivery noise, zero device non-compliance), the centralised greedy strategy achieves 100% curtailment reduction, constituting the theoretical performance upper bound. It must be emphasised that this upper bound is unattainable in engineering practice — it requires establishing a real-time bidirectional communication link with each of the N devices, incurring O(N) communication complexity, and any communication failure, latency, or device non-compliance would cause actual performance to fall below 100%.

Broadcast dispatch achieves 99.1% of the reduction capability of the centralised O(N) scheme with O(1) communication (Fig. 3b). Relative to the local threshold rule, the advantage of broadcast dispatch stems from the scoring signal’s continuous encoding of the grid’s real-time supply–demand state: devices do not simply charge to a fixed threshold and stop, but instead continue responding with a certain probability throughout the entire excess period according to the urgency conveyed by the scoring signal. This causes the temporal distribution of the fleet’s charging power to closely match the excess power curve, avoiding the temporal mismatch inherent in local rules. Relative to the centralised greedy upper bound, broadcast dispatch relinquishes optimal per-device command allocation in exchange for an architectural simplification of communication complexity from O(N) to O(1), with a total reduction performance loss of only approximately 0.9 percentage points.

## D.5 Experimental Design for Cross-Regional Transfer Deployment

In practical operations, the standard deployment procedure when an aggregator expands to a new region is as follows: after devices in the new region are registered on the network, the platform constructs a regionalised simulation based on their declared static parameters (rated capacity, power range, dispatchable periods, etc.) and completes aggregate curve calibration. However, to test the generalisation capability of the broadcast dispatch model under the most adverse conditions, this experiment deliberately bypasses the registration-calibration step and directly deploys the model trained in the source domain (i.e., the region with 5,000 devices in the primary simulation) to three target regions with significantly different device parameters and supply–demand structures.

Region B has device rated capacities ranging from 2 to 50 kWh, exhibiting a wider capacity distribution than the source domain, with a higher supply-to-demand ratio and greater daytime excess magnitude than the source domain. Region C has device capacities concentrated in the narrow range of 8–15 kWh, with heterogeneity significantly lower than the source domain, a lower supply-to-demand ratio, and shorter excess periods. Region D has device capacities spanning 5–100 kWh in an extremely heterogeneous distribution, comprising a mixture of numerous small residential storage units and a smaller number of large commercial and industrial storage units. The device count in all three regions is kept identical to the source domain (5,000) to control for scale effects on the generalisation assessment.

## D.6 Cold-Start Performance and Online Adaptation Convergence

When the source domain model is directly deployed to target regions (cold start, i.e., without any parameter adaptation), prediction performance degrades to varying degrees. The cold-start across the three regions is approximately: 0.84 for Region B, 0.98 for Region C, and 0.46 for Region D (Fig. 5a). The magnitude of degradation correlates positively with the degree of device composition difference between the target and source regions. Region C, whose capacity range (8–15 kWh) has high overlap with the source domain, maintains relatively high accuracy even at cold start; Region D, whose extreme capacity distribution causes the shape of the aggregate response curve to differ most from the source domain, exhibits the lowest cold-start accuracy. This result is consistent with expectations: the specific numerical values of the aggregate response are determined by the device parameter distribution, and inter-regional parameter differences naturally induce input–output mapping mismatch.

**Online adaptation protocol.** The regularisation strength in is selected from by 5-fold cross-validation on the first 50 adaptation samples. Each new observation triggers a single gradient step with learning rate . Every 100 accumulated samples, the nonconformity scores are recomputed on the growing adaptation dataset and the conformal threshold is refreshed. Convergence is declared when the rolling over the most recent 50 samples changes by less than 0.005 across three consecutive windows.

The online adaptation mechanism requires only substation-level aggregate power measurements as the feedback signal. Such measurements are routinely collected by the grid’s existing SCADA (Supervisory Control and Data Acquisition) system and constitute O(1)-scale data — regardless of how many devices are present in the region, the substation-level measurement always consists of a single aggregate value. Consequently, online adaptation introduces no additional communication links and requires no device-level state reporting whatsoever.

Convergence speed is positively correlated with the magnitude of domain shift. Region C, whose device composition closely resembles the source domain (cold-start ), requires only on the order of tens of adaptation samples (i.e., tens of 5-minute dispatch cycles, corresponding to several hours of operation) to converge. Region B, with moderate device composition differences (cold-start ), requires on the order of hundreds of samples. Region D, which exhibits the most pronounced differences (cold-start ), requires on the order of thousands of samples (corresponding to several days of operation) to converge.

After sufficient online adaptation, the prediction accuracy in all three target regions converges to the range of = 0.989–0.992, approaching the accuracy ceiling of the source domain model on the source domain itself ( = 0.992, indicated by the dashed line in Fig. 5a). This convergence level is constrained by both the capacity of the current model architecture (i.e., the parameter scale and expressive power of the dual quantile neural network) and the finite size of the adaptation sample. It does not represent the theoretical limit of generalisation accuracy — a higher-capacity model or a longer adaptation window could potentially further improve accuracy, but the current level already satisfies the engineering requirements for closed-loop dispatch.

## D.7 Engineering Implications and Applicability Boundaries

The cross-regional generalisation results carry two engineering implications. First, the high adapted accuracy ( ≥ 0.989) across three regions with substantially different device parameter distributions demonstrates that the predictability of aggregate response is a structural property of large heterogeneous populations, not an artefact of overfitting to the source-domain parameter combination. If the model had merely memorised source-domain patterns, cold-start accuracy would be uniformly poor rather than varying systematically with distributional distance (Region C: 0.98 vs Region D: 0.46).

Second, the validation is subject to explicit applicability boundaries. Within the pooled = 0.980, inter-scenario mean differences contribute 86.9% of the total variance, meaning the high numerical value partly reflects correct discrimination of scenario means rather than within-scenario precision alone. The remaining irreducible validation gap concerns the behavioural model: real device firmware may implement response logic different from the Bernoulli binary model assumed here. While the convergence law does not depend on the specific functional form of individual responses, systematic firmware-level deviations could alter the shape of the aggregation function, exceeding the corrective capacity of the current online adaptation mechanism. Controlled field trials with 50–100 real devices at a single distribution transformer are needed to close this gap.

## D.8 Validation Based on Real Deployment Parameters

The transfer validation across the three synthetic regions above varied device compositions but still used artificially specified parameter distributions. To further examine the consistency of the aggregation mechanism under real-world parameter conditions, we introduce the NextGen ACT Australia open dataset. This dataset contains measured household battery parameters from 100 households in the Australian Capital Territory (Canberra region), with rated capacities ranging from 4.8 to 19.5 kWh and C-rates from 0.19 to 1.04, reflecting the actual diversity of equipment selection in the real residential storage market.

The measured parameters from these 100 households are injected into the complete simulation pipeline — including device initialization, broadcast signal generation, local decision execution, and aggregate power computation — to constitute a fourth deployment region. This region is the only one among the four validation regions whose parameters are derived from real deployments rather than artificial specification, and therefore serves as a bridge in generalizing simulation conclusions to real-world deployments.

On this real-parameter region, the cross-scenario (combining all four scenario types: normal absorption, normal support, emergency absorption, and emergency support) pooled = 0.980 (95% CI [0.977, 0.982]), and the prediction interval coverage probability PICP = 87.9% (Fig. 5b). The scaling slope of the CV (coefficient of variation) with device count N is -0.51, in close agreement with the theoretical expectation of -0.50 (i.e., the convergence law) (Fig. 5c). This result confirms that the statistical convergence behaviour of aggregate response does not depend on the specific form of the device parameter distribution — whether parameters are drawn from artificially specified uniform distributions, normal distributions, or the non-parametric empirical distribution of a real market, the convergence law holds. This finding advances the signal determinism conclusion established in Result 1 of the main text, which was based on synthetic parameter spaces, to real-world deployment parameter conditions, narrowing the gap between simulation conclusions and real-world deployment.

# Section E. Complete Analysis of Inter-Device Correlation Effects on Aggregation Accuracy

## E.1 Distinguishing Types of Independence: Cross-Sectional Independence versus Time-Series Independence

The aggregation accuracy of broadcast dispatch depends on a specific form of statistical independence that must be carefully distinguished. Time-series independence concerns a single device's responses across consecutive time steps; this does not hold for energy storage because the state of charge exhibits strong temporal autocorrelation (each step's SOC is determined by the previous step's SOC plus charge/discharge). Cross-sectional independence concerns the responses of N different devices at the same time step, conditioned on the common broadcast signal. The aggregation analysis in this work relies exclusively on cross-sectional independence: given a common score value s, each device's response is determined by its own local state (SOC, capacity, headroom) and an independent Bernoulli draw, with no information coupling between devices. The loss of time-series independence does not compromise the aggregation mechanism because the law-of-large-numbers convergence operates across devices at each time step, not across time steps for a single device. This distinction is critical: an objection to independence based on SOC autocorrelation would conflate the two types. The analysis that follows therefore focuses entirely on cross-sectional correlation and its effect on the effective sample size.

## E.2 Feeder-Level Grouped Correlation Model

E.2.1 Model Motivation

In real urban distribution networks, cross-sectional correlation among devices arises primarily from two categories of physical and behavioural mechanisms.

The first category is voltage coupling. Multiple energy storage devices connected to the same low-voltage feeder (typical length 200–500 metres, serving 20–100 households) share a common distribution line impedance. When the voltage at the feeder tail end rises due to photovoltaic output fluctuations, the battery management systems of all devices on the same feeder may simultaneously trigger voltage protection limits, causing synchronous curtailment of charging power. This coupling mechanism induces positive correlation among the responses of devices on the same feeder. The coupling strength depends on feeder impedance, transformer capacity, photovoltaic penetration rate, and the distribution of device positions along the feeder. The literature reports that on low-voltage feeders with high photovoltaic penetration, the correlation coefficient between tail-end and head-end voltages can reach 0.7–0.9; however, after filtering through the nonlinear response function of battery management systems, the correlation coefficient between device power responses typically falls to the order of 0.01–0.05.

The second category is behavioural similarity. Residents of the same community tend to share similar daily routines and energy usage habits: collectively setting charging schedules before leaving home in the morning and collectively initiating discharge upon returning in the evening. This behavioural synchronisation causes the SOC trajectories of devices in the same area to exhibit similar intra-day fluctuation patterns, thereby producing correlated responses to the same score signal. Behavioural similarity may also be amplified through social network effects — information exchange among neighbours regarding energy storage usage strategies can lead to a “bandwagon effect”, causing device preference parameters within localised areas to converge.

The common characteristic of these two categories of correlation is spatial locality: voltage coupling is confined to the physical extent of a single feeder, and behavioural similarity is confined to the geographical proximity of a community. Across feeders and communities, voltage coupling is substantially attenuated by transformer isolation, and behavioural differences increase due to diversity in socioeconomic backgrounds. Therefore, modelling inter-device correlation as a feeder-level grouped structure constitutes a first-order approximation of the physical and social structure of real distribution networks.

E.2.2 Formal Model Definition

The devices are partitioned into feeder groups, each containing devices (equal group sizes are assumed to simplify the derivation; the generalisation to unequal group sizes is presented in Section E.2.3). The power response of device at time step is . Given the score value , the conditional correlation coefficient between within-group device pairs is , and the conditional correlation coefficient between cross-group device pairs is 0:

(S11)

where . It is further assumed that all devices have equal conditional variance, i.e., for all . This homoscedasticity assumption does not strictly hold when devices are highly heterogeneous, but is necessary for deriving an analytical expression for the effective sample size. Section E.6 verifies the approximation accuracy of this assumption in heterogeneous device populations through simulation.

E.2.3 Generalisation to Unequal Group Sizes

If the device counts across feeder groups are unequal, with group containing devices (), the aggregate variance derivation requires group-by-group accumulation. The variance contribution from within each group is , and the total aggregate variance is:

(S12)

The corresponding effective sample size is:

(S13)

When all group sizes are equal (), the expression reduces to the equal-group formula in Section E.3. When group sizes are highly uneven (e.g., a few large feeders serving a large number of devices), the effective sample size is further reduced below the equal-group estimate, meaning that the analysis under the equal-group assumption provides an optimistic estimate for the actual situation.

## E.3 Analytical Derivation of the Effective Sample Size

Under the model of Section E.2.2, the conditional variance of the aggregate power is . Decomposing the summation according to the group structure, each group contains variance terms () and covariance terms (, same group), while cross-group covariances are zero, yielding . Under complete independence (), . The effective sample size is defined as the equivalent number of independent devices that would produce the same aggregate variance under the homoscedastic independence assumption:

(S14)

This expression has a clear physical interpretation: the denominator is the variance inflation factor (VIF), which quantifies the amplification effect of within-group correlation on aggregate variance. When , ; when , , meaning each group degenerates to a single effective sample and the effective sample size equals the number of groups.

For the simulation configuration of this paper (, regions, devices/region), the relationship becomes . Substituting representative values: yields ; yields ; yields ; yields .

## E.4 Simulation Protocol and Parameter Sweep

Sections E.2–E.3 established the analytical framework of the grouped correlation model, providing a closed-form expression for the effective sample size . This section validates the accuracy of this analytical framework through controlled simulation experiments and measures the stability of the normalised coefficient of variation across different correlation levels.

E.4.1 Correlation Injection Method

To introduce controllable cross-sectional correlation in the simulation, we employ the logit-space persistent perturbation method. At the beginning of each simulation run, a global environmental perturbation is generated (modelling macroscopic factors such as weather and grid frequency), along with a local perturbation for each region (modelling regional factors such as urban heat islands and local meteorology). The total perturbation shared by all devices within region is:

(S15)

The baseline response probability of device is determined by the score signal and local SOC. After correlation injection, the actual response probability becomes:

(S16)

where is the logistic function and is the region to which device belongs. This perturbation remains constant (persistent) throughout the simulation run, reflecting the quasi-static nature of environmental conditions at the simulation time scale (hourly). Under this model, the within-group correlation coefficient between the responses of two devices in the same region is approximately:

(S17)

where is the total perturbation standard deviation and is the typical value of the marginal response probability. By adjusting the magnitudes of and , the target correlation coefficient can be controlled. This method operates directly in the logit space of response probabilities, preserving each device’s response as a Bernoulli trial while introducing within-region dependence structure solely through shared environmental perturbations.

E.4.2 Parameter Sweep Space

The parameter sweep covers six perturbation strength configurations: , corresponding to analytical correlation coefficients . For each configuration, 10 independent simulation runs are executed under the support scenario, with 100 time steps per run (60-second time step interval). All runs share the same device population parameters (random seed 42), differing only in the random seed of the response phase, to isolate the cross-run variance induced by environmental perturbation from the variance induced by device composition differences.

For each experimental run, the aggregate power mean and population response rate are recorded, which are used to compute the cross-run coefficient of variation CV and the normalised coefficient of variation .

E.4.3 Estimation of the Correlation Coefficient

The within-group correlation coefficient of the logit-space perturbation model is given by the analytical formula . This approximation is highly accurate when ; as increases, the nonlinear compression of the sigmoid function causes the actual correlation coefficient to be slightly lower than the analytical estimate. In all subsequent analyses, the analytically estimated values are uniformly used to calculate , which provides a conservative (upward-biased) estimate of the correlation effect.

## E.5 Invariance of the Convergence Rate Under Correlation

E.5.1 Theoretical Prediction

Under the grouped correlation model of Section E.3, the coefficient of variation of the aggregate power is:

(S18)

where is the conditional mean of a single device. The normalised coefficient of variation is defined as:

(S19)

This quantity depends only on the conditional coefficient of variation of a single device and is independent of , , , and . Therefore, the theoretical prediction is that the normalised coefficient of variation is constant across all correlation levels.

E.5.2 Simulation Verification

Fig. 4d shows the variation of the normalised coefficient of variation with . Across the five non-zero correlation levels ( from 0.003 to 0.061), the measured values of are 0.34, 0.36, 0.38, 0.40, and 0.39, respectively, fluctuating within the range 0.34–0.40 with no systematic trend. The for the independent case () is significantly lower than the non-zero cases, because the persistent perturbation model introduces no environmental shocks when , and the cross-run variance arises solely from the intrinsic randomness of Bernoulli responses (), whose effective single-device coefficient of variation is far smaller than the value under environmental perturbations.

The consistency of across non-zero correlation levels confirms that the framework correctly captures the amplification effect of correlation on aggregate variance. The sources of fluctuation include finite-sample effects (only 10 runs per configuration) and the weak nonlinear modulation of effective variance by the sigmoid function at different levels. This result experimentally confirms that, within the parameter space of the simulations in this paper, correlation does not alter the convergence law.

E.5.3 Physical Intuition for Convergence Rate Invariance

The invariance of the convergence rate can be understood as follows. Within-group correlation causes the aggregate behaviour of each group of devices to be equivalent to approximately independent devices. Once this equivalence substitution is made, the independence among groups guarantees that cross-group aggregation still follows the classical central limit theorem. Therefore, the sole effect of correlation is to reduce the effective sample size, rather than to introduce a new statistical dependence structure. The validity of this conclusion rests on two conditions: strict inter-group independence and uniform within-group correlation coefficient across all device pairs within a group. When inter-group correlation is non-zero (e.g., multiple feeders sharing the same medium-voltage transformer) or when the within-group correlation structure is non-uniform (e.g., stronger voltage coupling among devices at the feeder tail than at the head), the above analysis must be generalised to a more general correlation matrix structure, and the calculation of the effective sample size will involve the eigenvalue spectrum of the correlation matrix (see Section E.9 for discussion).

## E.6 Generalisation of the Threshold Formula Under Correlation

The engineering accuracy threshold formula given in Result 1 is , where is the estimated conditional variance of normalised single-device power and is the acceptable upper bound on the normalised aggregation error. The derivation of this formula implicitly assumes conditional independence among devices. Under the grouped correlation model, the derivation proceeds in an entirely parallel manner, requiring only the replacement of with : requiring yields . Therefore, the threshold condition becomes , i.e.:

(S20)

This expression gives the minimum number of physical devices required to achieve the target accuracy for a given correlation level and feeder group size . Compared with the independent case, the compensation factor for the required number of physical devices is the variance inflation factor .

Using the simulation parameters of this paper as an example (, ): when , the compensation factor is , and the required number of physical devices is ; when , the compensation factor is , and the required number of physical devices is . Even under the most extreme correlation level, the required number of devices remains well below the installed base of distributed energy storage in a medium-sized city (tens of thousands to hundreds of thousands of units).

To verify the accuracy of the above generalised formula, we re-estimated the threshold at each level through subsampling experiments. Specifically, subsets of increasing size were randomly drawn from the 5,000 devices (preserving the feeder group structure), was computed for each subset size, and the minimum subset size at which first exceeded 0.95 was determined. The results show that the deviation between the empirically measured threshold and the formula prediction does not exceed 20% at any level, with the deviation direction being that the measured threshold is slightly lower than the predicted value (i.e., the formula provides a conservative estimate). This is consistent with the direction in which the homoscedasticity assumption slightly overestimates the variance inflation effect in heterogeneous device populations.

## E.7 Estimation of the Correlation Level in the Current Simulation Configuration

E.7.1 Sources of Correlation in the Default Simulation

The default simulation configuration of the main experiments in this paper (Results 1–4) does not explicitly inject logit-space perturbations (), but weak implicit correlations among devices may still exist. Their sources include: (1) all devices receive the same score signal , causing synchronous variation in the conditional mean of responses — however, this constitutes a systematic component explained by the conditioning variable (the score value) and is removed when computing conditional correlation coefficients; (2) device parameters (rated capacity, efficiency, SOC preference range) are independently sampled from finite probability distributions, and the distributional shape imposes a common constraint on population behaviour, but device responses are independent conditional on their parameters; (3) all devices in the simulation have strictly synchronised clocks and the score signal has zero transmission delay, eliminating the decorrelation effect that might arise from differential signal reception timing in real systems — this causes the correlation estimate in the simulation to be slightly higher than in actual systems.

E.7.2 Upper Bound Estimation of the Implicit Correlation Level

The default simulation does not inject explicit perturbations, making it impossible to directly isolate the cross-sectional correlation coefficient from the simulation output. As an alternative, we use the weakest perturbation configuration from the sensitivity sweep in Section E.4 (, , analytical ) as a **conservative upper bound** for the implicit correlation level of the default simulation: this configuration superimposes weak environmental perturbations on top of regional SOC initialisation clustering, and its correlation is necessarily higher than the implicit correlation level of the default simulation ().

The measured for this configuration ( regions, ), with consistent with values at higher correlation levels (0.36–0.40), confirms that the framework is valid at this correlation level. The cross-region device-pair correlation is driven by the global perturbation , but corresponds to a cross-group , whose impact on is far smaller than that of within-group correlation, consistent with the inter-group independence assumption of the grouped model.

Taking as the estimated correlation level of the default simulation, the corresponding effective sample size is (empirically measured; the analytical formula is slightly higher because the analytical is rounded to 0.003 whereas the actual value is 0.00312). This value is far above the engineering accuracy threshold , with a margin factor of approximately 8-fold. It is precisely this ample margin that causes the CV decay slope measured through subsampling experiments in Result 1 (−0.51) to closely match the theoretical value under complete independence (−0.50) — the difference between the two (0.01) is far smaller than the statistical uncertainty of the finite-sample estimate.

## E.8 Derivation of Deployment Criteria

Based on the above analysis, two quantitative deployment criteria can be formulated for broadcast dispatch in real distribution networks.

Criterion 1: Condition for deployment without modification. This requires with a reasonable margin (margin factor of 3, i.e., ). Under the current simulation configuration (, , ), this yields , or equivalently . Even without requiring a margin (margin factor of 1), the threshold is , which still exceeds the typical level of physical coupling (0.01–0.03). Therefore, at the scale of 5,000 devices, the accuracy guarantee of exhibits good robustness to within-group correlation. The criterion under 3-fold margin is consistent with the default simulation correlation level measured in Section E.7.2 () and can serve as a conservative criterion for “deployment without any architectural modification”.

Criterion 2: Device count compensation formula. If the feeder structure of the deployment area leads to , the target can be restored by increasing the number of enrolled devices. The required minimum number of physical devices is:

(S21)

where is the margin factor (recommended value of 3). The input parameters to this formula — (determined by the aggregation curve calibration experiment), (determined by the distribution network feeder structure), and (estimated from feeder electrical parameters and user behaviour surveys) — can all be obtained prior to deployment, making the compensation estimate operationally feasible.

## E.9 Sensitivity Analysis: Physical Coupling and Behavioural Contagion

E.9.1 Characteristic Differences Between Two Sources of Correlation

Although physical coupling (voltage effects) and behavioural contagion (community bandwagon effects) produce formally identical within the grouped correlation model, they differ fundamentally in the following respects.

Predictability of correlation strength. The strength of physical coupling can be estimated a priori from distribution network electrical parameters (line impedance, transformer capacity, load distribution), with literature-reported at the power response level generally not exceeding 0.01–0.03. The strength of behavioural contagion depends on social network structure, cultural context, and information dissemination dynamics, and is difficult to quantify a priori; moreover, it may exhibit abrupt jumps triggered by specific events (e.g., media coverage, community promotion campaigns).

Stability of spatial structure. Physical coupling strictly follows the distribution network topology, and the group structure (which devices belong to the same feeder) remains fixed until network reconfiguration. The spatial extent of behavioural contagion is more flexible — social network connections may cross physical feeder boundaries, causing the actual “behavioural groups” to not fully coincide with “feeder groups”.

Time scale. Physical coupling operates on millisecond-to-second time scales and appears quasi-static within 5-minute dispatch intervals. Behavioural contagion evolves on hour-to-day time scales and may cause to exhibit slow drift within a day.

E.9.2 Impact of Behavioural Contagion on the Applicability of the Grouped Model

When behavioural contagion becomes the dominant source of correlation, the strict feeder-level grouping structure of Section E.2.2 may no longer be applicable. To assess this impact, we constructed an extended simulation experiment: a weak positive cross-group correlation layer is superimposed on the feeder-level grouped correlation to simulate behavioural contagion effects. The specific implementation introduces a global common factor , which is added to the SOC update equation of all devices, inducing a baseline correlation coefficient between any two devices regardless of group membership. Under this model, the total correlation coefficient for within-group device pairs is , and the correlation coefficient for cross-group device pairs is .

Under this extended model, the analytical expression for the effective sample size becomes:

(S22)

When , the new term in the denominator grows linearly with , meaning that even extremely weak cross-group correlation between each device pair can significantly affect when is large. For example, with , , , and , the effective sample size falls to . Compared with the case of no cross-group correlation (), where (note that here), cross-group correlation further reduces the effective sample size by approximately 27%. More critically, when increases to 0.005, , which approaches the threshold , leaving virtually no margin. This calculation demonstrates that the broadcast dispatch architecture is significantly more sensitive to cross-group correlation (the typical manifestation of behavioural contagion) than to within-group correlation (the typical manifestation of physical coupling). The reason is that cross-group correlation involves device pairs, whereas within-group correlation involves only device pairs.

E.9.3 Recommendations for Practical Deployment

The above analysis demonstrates that the grouped correlation model is a reliable approximation when physical coupling is the dominant source of correlation, but may underestimate the impact of correlation on in areas where behavioural contagion is significant. For practical deployment, we recommend:

(1) During the initial deployment phase, estimate the actual cross-sectional correlation matrix structure through data reported by a limited number of devices (e.g., sampling 1%–5% of devices to report 5-minute power data during a short-term survey window). This data collection is a one-time, non-real-time activity that does not affect the unidirectional communication architecture during the operational phase.

(2) Compute a more precise estimate of based on the estimated correlation matrix. For a general correlation matrix (with elements ), the effective sample size is given by:

(S23)

where is the all-ones vector. This formula does not depend on any grouping structure assumption and is applicable to arbitrary correlation matrices.

(3) If the estimated falls below , three remedial measures can be adopted: increasing the number of physically enrolled devices; introducing geographical diversity within the aggregator’s coverage area (recruiting devices across multiple communities to dilute the behavioural contagion effect); or incorporating individualised random perturbations in the device-side response rules to achieve artificial decorrelation. The third measure improves aggregate predictability at the cost of a small sacrifice in single-device optimality; its effect is equivalent to superimposing independent noise on the diagonal of the correlation matrix, thereby effectively reducing .

It should be noted that the simulation in this paper adopts a grouping structure of regions ( devices/region), which constitutes a conservative estimate of the correlation impact. In actual urban distribution networks, feeder-level grouping is more natural (typical values , ), in which case the variance inflation factor is far smaller than the of the simulation configuration. For example, at , the feeder-level grouping yields (compared with 455 for the simulation configuration), improving the deployment margin by approximately 7-fold. Therefore, all thresholds and compensation quantities derived in this section based on are conservative upper bounds, and actual deployment conditions will only be more favourable.

## E.10 Limitations

The analysis in this section is subject to the following limitations. First, the homoscedasticity assumption ( for all ) does not strictly hold in highly heterogeneous device populations. The power response variance of large-capacity and small-capacity devices may differ by several fold. Under heteroscedasticity, the effective sample size calculation requires a weighted formula; the simulation verification in Section E.6 shows that the bias introduced by the homoscedasticity assumption does not exceed 20%, and its direction is to conservatively overestimate the required number of devices.

Second, the within-group correlation coefficient is assumed to be a time-invariant constant, but the strength of physical coupling may vary with photovoltaic output levels (higher photovoltaic output leads to larger voltage deviations and higher ), and the strength of behavioural contagion may vary by time of day (user behaviour is more synchronised during peak hours). Handling time-varying requires dynamically updating the estimate at each time step, increasing the online computational burden.

Third, the grouped correlation model assumes that all device pairs within a group share the same , neglecting the distance-decay effect within feeders (voltage coupling is stronger among devices at the feeder tail than at the head). A more refined spatial correlation model can improve estimation accuracy but increases parameterisation complexity.

Fourth, all correlation analyses in this paper are based on digital twin simulation data; although the simulation parameters have been calibrated against publicly available field measurement data, the correlation structure in actual distribution networks may exhibit characteristics not captured by the simulation. When applying the analytical framework described above to actual deployment, the field verification steps recommended in Section E.9.3 must not be omitted.

# Section F. Relationship to Ripple Control and Historical Broadcast Load Management

Single-channel broadcast coordination of distributed loads has a long operational history. Ripple control, deployed since the 1950s across Australia, New Zealand, Germany, Switzerland, and several other countries, uses a low-frequency signal injected onto the power line (typically 175–1,600 Hz) to switch groups of thermostatically controlled loads — most commonly electric hot-water cylinders — on or off according to a pre-determined schedule or real-time grid conditions. Ripple control has proven remarkably durable in practice and remains in active use in parts of the New Zealand and Australian distribution networks. Given the superficial similarity — both ripple control and the architecture proposed in this paper employ a one-to-all broadcast signal to coordinate large populations of distributed energy devices without per-device communication — it is important to delineate precisely where the two approaches coincide and where they diverge.

## F.1 Coordination mechanism: deterministic group switching versus probabilistic individual response

The operational logic of ripple control rests on deterministic group assignment. Prior to deployment, each controllable device is assigned to one of a finite number of control groups (typically identified by a unique address code embedded in the ripple signal frame). When the system operator wishes to curtail or restore a particular tranche of load, it broadcasts the address of the corresponding group together with an on or off command. The aggregated power response is therefore the arithmetic sum of the rated capacities of all devices in the addressed group, modulated by their instantaneous availability (e.g., whether a hot-water cylinder’s thermostat has already reached its upper set-point). Control resolution — the number of distinct aggregate power levels that the operator can command — is bounded by the number of groups, which in turn is bounded by the address space of the signalling protocol.

The architecture proposed in this paper operates on a fundamentally different principle. No device is assigned to any group. The broadcast signal carries a single scalar value — an activation intensity — that is identical for all devices. Each device independently and stochastically determines its own power output by sampling from a local response distribution conditioned on and on its own state (state of charge, rated power, user constraints). The aggregate power that emerges at the population level is not the result of the operator selecting which devices to activate, but rather the statistical outcome of a large number of independent random decisions. The operator does not choose a subset of devices; the operator sets a field intensity, and the population-level response self-organises through the law of large numbers.

This distinction is not merely semantic. It entails a qualitative difference in the nature of the control output: ripple control produces a discrete set of attainable aggregate power levels (one per group combination), whereas probabilistic broadcast control produces a continuously tuneable aggregate response whose resolution improves with the number of participating devices.

## F.2 Complexity and the role of fleet size

In ripple control, the system operator must maintain a group allocation table that maps every device to its assigned group and records the estimated aggregate capacity of each group. When devices are added, removed, or degraded, this table must be updated to preserve the accuracy of the operator’s expectation of each group’s response. The configuration complexity of ripple control therefore scales as in the number of enrolled devices, even though the runtime communication complexity of each broadcast command is .

In the proposed architecture, both runtime communication complexity and configuration complexity are . No per-device registration, grouping, or capacity estimation is required at the operator side. A newly installed battery that implements the local response protocol immediately becomes part of the statistical ensemble without any change to the operator’s model or signal encoding. The operator’s only persistent model parameter is an estimate of the population-level response distribution, which can be learned and updated from aggregate metering data alone, without knowledge of individual device identities or states.

More fundamentally, the two architectures assign opposite roles to fleet size . Under ripple control, growth in increases the management burden: more devices require finer grouping to maintain control resolution, and group-capacity estimates become less accurate as intra-group heterogeneity grows. Under probabilistic broadcast control, growth in is a statistical asset. The coefficient of variation of the aggregate response scales as (Result 1 of the main text), meaning that each additional device tightens the distribution of the aggregate outcome around its expected value. Where ripple control is hindered by increasing scale, the proposed architecture draws strength from it.

## F.3 Heterogeneity tolerance

Ripple control implicitly assumes intra-group homogeneity. If all devices within a group have similar rated power and similar thermal or electrochemical states, the operator’s estimate of the group’s aggregate response will be accurate. As the fleet diversifies — mixing devices of different manufacturers, capacities, degradation levels, and usage patterns — intra-group variance increases and the operator’s predictive accuracy degrades, unless groups are subdivided further (which consumes address space and adds configuration complexity).

Probabilistic broadcast control is inherently robust to device-level heterogeneity. The convergence guarantee provided by the law of large numbers requires only that device responses be independent (or weakly dependent) with finite variance; it places no restriction on the shape of individual response distributions or on cross-device homogeneity. As demonstrated in Result 1 of the main text (and visualised in Fig. 2d of the main text), moderate heterogeneity in battery capacity, state of charge, and power rating does not systematically degrade aggregate tracking accuracy, provided the fleet size exceeds the minimum ensemble threshold .

## F.4 Uncertainty quantification

Ripple control offers no native mechanism for uncertainty quantification. After issuing a group-switch command, the operator’s estimate of the realised aggregate response is a point estimate derived from the group allocation table and historical compliance rates. There is no closed-form expression for the width of the uncertainty band, and no distribution-free coverage guarantee.

The statistical foundation of the proposed architecture, by contrast, provides a built-in uncertainty quantification framework. The scaling law yields an analytical approximation of the aggregate response variance for any given fleet size and signal intensity. Furthermore, the conformal quantile regression layer described in Methods produces prediction intervals with finite-sample, distribution-free marginal coverage guarantees (Result 3 of the main text). This capability is operationally significant: it allows the grid operator to size reserve margins against the residual uncertainty of the broadcast-controlled fleet with known confidence, rather than relying on heuristic safety factors.

## F.5 Summary of distinctions

The relationship between ripple control and the architecture proposed in this paper is best understood as one of paradigmatic succession rather than incremental improvement. Ripple control established the engineering viability of broadcast-channel load coordination and demonstrated that large device populations can be reached without per-device communication — a foundational insight on which this work builds. The contribution of the present paper is to show that, on such a broadcast channel, transmitting a single scalar intensity signal is sufficient to achieve continuously tuneable, statistically predictable, and uncertainty-quantified control of aggregate fleet power, through the mechanism of probabilistic individual response and large-number statistical emergence. This is a capability that the deterministic group-switching logic of ripple control cannot, in principle, provide, regardless of signal carrier or encoding sophistication.

# Section G. Comparative Analysis of Candidate Broadcast Physical Layers

## G.1 Motivation and Scope

The O(1) broadcast scheduling architecture developed in the main text is, by design, agnostic to the physical-layer carrier: any unidirectional channel capable of delivering a compact downlink frame (≤ 64 bits every 5 minutes) to all enrolled devices within a coverage footprint is a valid instantiation. Throughout the paper we adopt a low-Earth-orbit (LEO) satellite narrowband link as the reference implementation. A natural question — raised, appropriately, by a reviewer — is whether terrestrial broadcast technologies such as FM Radio Data System (RDS) subcarriers or LoRa Class-C multicast would be more practical and more economical, particularly for single-city deployments. This section provides a systematic, quantitative comparison across five evaluation dimensions: per-device hardware cost, infrastructure deployment cost and its scaling behaviour, disaster resilience, regulatory and spectrum complexity, and coverage uniformity. We consider five candidate technologies: (i) FM RDS subcarrier, (ii) LoRa Class-C multicast, (iii) DAB/DAB+ data channel, (iv) 5G Multicast–Broadcast Services (MBS), and (v) LEO satellite narrowband downlink. The analysis shows that while FM and LoRa offer attractive entry costs for a single pilot city, the LEO satellite link is the only candidate whose infrastructure cost scales as O(1) in the number of covered cities and whose availability is structurally independent of the terrestrial infrastructure they are designed to coordinate.

## G.2 Architecture-Layer Separation

Before comparing physical layers it is essential to delineate what the architecture does and does not require from the carrier. The scheduling logic — broadcast of a single scalar signal — local threshold-based device response, and statistical aggregation yielding a deterministic power mapping (main text, Results) — imposes only four requirements on the physical layer: (R1) unidirectional downlink with no per-device return channel, (R2) frame payload ≥ 64 bits, (R3) update interval ≤ 5 minutes, and (R4) simultaneous reception by all devices within the coverage footprint. Any technology satisfying R1–R4 is a compliant carrier. The comparative analysis that follows therefore evaluates candidates not on whether they can carry the signal — all five can — but on the system-level cost, resilience, and scalability consequences of choosing one over another.

## G.3 Per-Device Receiver Cost and Power Consumption

The receiver module that must be integrated into each battery management system (BMS) is the most frequently cited cost concern. We analyse it quantitatively.

For FM RDS reception, the required component is a single-chip FM tuner with RDS decoding capability. Commercial FM receiver ICs such as the Silicon Labs Si4735 are available at a bill-of-materials (BOM) cost of approximately $0.80–$1.50 in volumes exceeding 10⁶ units. The active-mode power consumption is on the order of 15–25 mW. Because the architecture requires only one frame every 5 minutes, the receiver can duty-cycle aggressively: assuming a 200 ms active window per cycle, the time-averaged power draw is approximately 10–17 μW — negligible relative to the 5–15 W standby consumption of a typical residential BMS.

For LoRa Class-C reception, the device requires a LoRa transceiver IC (e.g., Semtech SX1262) operated in continuous-receive Class-C mode. BOM cost is approximately $1.50–$2.50. Class-C mandates that the receiver remain active whenever it is not transmitting; however, since the architecture uses no uplink, the device can instead be configured in a timed-window Class-B-like mode, reducing average power consumption to approximately 20–40 μW. An important subtlety is that LoRa reception quality is sensitive to gateway density and local interference in the unlicensed ISM band; we return to this in Section G.5.

For LEO satellite narrowband reception, the functional requirement is strictly simpler than that of a GPS receiver: the device must acquire a single known-frequency downlink carrier and decode a 64-bit frame, whereas a GPS receiver must simultaneously track signals from multiple satellites, perform code-phase correlation across 1,023-chip Gold codes, and execute a least-squares pseudorange solution. GPS receiver ICs (e.g., u-blox MAX-M10S) ship at BOM costs below $1.00 in volumes exceeding 10⁹ cumulative units. There is no fundamental reason for a receive-only narrowband L-band module, which has strictly lower computational complexity, to exceed this cost floor at comparable volumes. We conservatively estimate $1.00–$2.00. Power consumption follows the same duty-cycle logic as FM: with a 100 ms decode window every 5 minutes, average power is in the single-digit microwatt range.

For DAB data-channel reception, chipset costs are higher ($2.50–$5.00) because DAB demodulation involves OFDM processing and Viterbi decoding, and the ecosystem is smaller than that of FM or GPS. For 5G MBS reception, a 5G modem module (e.g., Qualcomm SDX55-based) currently costs $15–$40, which is an order of magnitude above all other candidates and introduces a cellular subscription dependency that conflicts with the architecture’s zero-recurring-cost design philosophy.

In summary, the per-device cost differences among FM, LoRa, and LEO satellite receivers are within a $1 band ($0.80–$2.00) and are economically indistinguishable when amortised over the 10–15 year operational life of a residential battery system whose installed cost is $5,000–$15,000. The per-device cost dimension does not meaningfully differentiate the three leading candidates.

## G.4 Infrastructure Cost and Scaling Behaviour

This dimension is where the candidates diverge most sharply, and it is the primary reason for our selection of the satellite reference implementation.

An FM RDS deployment requires access to an FM broadcast transmitter. In a single city, the aggregator must negotiate a subcarrier lease with a local FM station operator. Typical commercial RDS subcarrier lease rates range from $500 to $3,000 per month per station in North American and European markets, depending on transmitter power and coverage radius. For a city-scale coverage footprint of 30–50 km radius, a single high-power FM transmitter often suffices, yielding an annual infrastructure cost of $6,000–$36,000 — unquestionably economical. However, when the aggregator expands to cities, this cost must be replicated in each city: a new lease must be negotiated with a new local broadcaster, subject to local spectrum availability, commercial terms, and regulatory approval. The infrastructure cost therefore scales as in the number of cities. Moreover, each lease introduces a contractual dependency on a third-party broadcaster whose commercial priorities are unrelated to energy services, creating a supply-chain fragility that is difficult to hedge.

A LoRa multicast deployment requires a network of LoRa gateways with sufficient spatial density to guarantee indoor reception reliability across the service area. For a mid-sized city (population 500,000, area ~200 km²), empirical data from networks such as The Things Network indicate that 50–200 gateways are needed for reliable urban coverage, depending on building density and terrain. Each gateway entails hardware cost ($150–$500), site acquisition or co-location rental ($50–$200/month), power supply, and IP backhaul connectivity. Taking a conservative estimate of 80 gateways at an all-in annual operating cost of $2,000 per gateway, the per-city annual infrastructure expenditure is approximately $160,000. Scaling to cities multiplies this by . Furthermore, the gateway network itself must be managed, monitored, and maintained — introducing an operations team whose size grows with . The infrastructure cost scales as with a substantially higher per-city coefficient than FM.

A LEO satellite narrowband link operates on a fundamentally different cost topology. The aggregator leases a time slot on a shared LEO transponder — for example, an Iridium Short Burst Data (SBD) slot or a dedicated narrowband channel on a newer constellation such as Orbcomm, Kinéis, or Lacuna Space. The lease provides coverage over an entire satellite footprint, which for a typical LEO constellation at 780 km altitude with inter-satellite links spans continental or global regions. Crucially, once the transponder lease is secured, the marginal infrastructure cost of adding the 2nd, 10th, or 100th city within the footprint is exactly zero: no new ground equipment is installed, no new spectrum is licensed, no new lease is negotiated, and no new operations staff is hired. The annual transponder lease cost for a narrowband, low-duty-cycle downlink of the type required here is estimated in the range of $20,000–$80,000 for continental coverage (author estimate based on published per-message rates for comparable low-throughput LEO narrowband services and industry benchmarks for shared transponder access; no public rate card exists for the specific broadcast use case described in this paper). At city, this is more expensive than FM and comparable to LoRa. At cities, the satellite cost remains $20,000–$80,000 while FM reaches $60,000–$360,000 and LoRa reaches $1,600,000. At , the cost ratio inverts dramatically. Table S3 summarises this crossover analysis.

The scaling law can be expressed concisely. Let denote the fixed annual satellite lease cost (independent of ), the per-city annual FM subcarrier lease, and the per-city annual LoRa network operating cost. The total annual infrastructure cost for each technology is:

(S24)

The satellite solution becomes cheaper than FM when , and cheaper than LoRa when . Using the midpoint estimates ( USD, USD, USD), the crossover with FM occurs at cities and with LoRa at city. Given that any commercially viable aggregator will operate across tens to hundreds of cities — consistent with the IEA projection of 1,200 GW of distributed storage globally by 2030 — the satellite solution is not merely competitive but structurally superior in the infrastructure cost dimension.

## G.5 Disaster Resilience

Distributed energy storage delivers its highest marginal value to the grid during extreme events: hurricanes, earthquakes, ice storms, and wildfires that disable centralised generation and transmission assets. It is precisely during these events that the scheduling communication channel must remain operational. This creates a design paradox for terrestrial broadcast technologies: the infrastructure they depend on shares the same geographic exposure as the infrastructure they are meant to coordinate.

FM broadcast towers are tall, exposed structures susceptible to wind loading, ice accretion, and seismic acceleration. During Hurricane Maria (Puerto Rico, 2017), over 95% of FM broadcast stations went off air. During the 2024 Noto Peninsula earthquake in Japan, multiple NHK relay transmitters suffered structural damage and power loss. If the scheduling channel is carried on an FM subcarrier, the aggregator loses the ability to dispatch distributed batteries at exactly the moment when such dispatch is most critical.

LoRa gateways, while individually less vulnerable than a single high-power FM tower, depend on three terrestrial infrastructure layers: mains power (or battery backup with limited duration), IP backhaul (fibre or cellular), and the physical integrity of the mounting structure. Any of these can be disrupted by a severe weather or seismic event. A distributed gateway network offers some spatial redundancy, but a city-wide event (e.g., prolonged power outage as in the February 2021 Texas winter storm) can disable the majority of gateways simultaneously.

A LEO satellite downlink is structurally decoupled from terrestrial infrastructure. The satellites are in orbit; the uplink earth station can be located in a geographically unrelated region (or multiple regions, for redundancy); and the device-side receiver requires only its own modest power supply, which is inherently available as long as the battery system itself is energised — a self-fulfilling condition, since a de-energised battery has nothing to dispatch. The scheduling channel therefore remains available whenever at least one enrolled device has stored energy, which is precisely the condition under which scheduling has value. This resilience property is not an incremental improvement over terrestrial alternatives; it is a qualitative difference arising from the physical separation of the communication infrastructure from the grid infrastructure.

## G.6 Regulatory and Spectrum Complexity

Regulatory overhead is an often-overlooked dimension that significantly affects deployment speed and cross-border scalability.

FM subcarrier use is governed by national broadcast regulators (e.g., FCC in the United States, Ofcom in the United Kingdom, ACMA in Australia). The rules governing RDS and subsidiary communications authority (SCA) subcarriers vary by jurisdiction: permissible data rates, allowable content types, and whether non-broadcast entities may lease subcarrier capacity are all jurisdiction-specific. An aggregator seeking to deploy in 20 countries must navigate 20 distinct regulatory frameworks, each with its own application process, timeline, and fee structure.

LoRa operates in unlicensed ISM bands, but “unlicensed” does not mean “unregulated.” The European Telecommunications Standards Institute (ETSI) imposes a 1% duty-cycle limit on the 868 MHz band in the EU, which constrains the gateway’s ability to transmit acknowledgements and, more importantly, limits the number of downlink frames per hour. In the United States, the FCC Part 15 rules for the 915 MHz band impose different constraints (frequency hopping or digital modulation spread spectrum requirements). In Japan, the relevant band is 920 MHz with yet another set of rules. While these constraints are navigable, they require per-region engineering adaptation and compliance testing — a recurring cost that scales with the number of jurisdictions.

Satellite L-band reception is a passive, receive-only activity and requires no spectrum licence in any jurisdiction we are aware of. The ITU Radio Regulations allocate L-band mobile-satellite service (MSS) spectrum on a primary basis, and the regulatory burden falls entirely on the satellite operator (who has already obtained the necessary orbital filing and landing rights). The aggregator and the end devices have zero regulatory obligations beyond compliance with standard electromagnetic compatibility (EMC) requirements that apply to all electronic equipment. This represents a qualitative simplification: the regulatory complexity of deploying in a new country is not merely low — it is zero.

## G.7 Coverage Uniformity and Indoor Reception

FM signals propagate well at VHF frequencies (88–108 MHz) and penetrate buildings effectively, giving FM an advantage in dense urban indoor environments. However, FM coverage is inherently tied to transmitter location: areas in terrain shadow or beyond the 50–70 km practical coverage radius require additional translators or relay transmitters, each of which must be separately licensed.

LoRa at sub-GHz frequencies also exhibits reasonable building penetration, but coverage uniformity depends critically on gateway placement. Coverage holes in urban environments are common and can only be resolved by deploying additional gateways — a process that re-introduces the O(M) infrastructure scaling problem at the intra-city level.

LEO satellite L-band signals (approximately 1.5–1.6 GHz) experience greater free-space path loss than FM and moderate building penetration loss (typically 10–20 dB through a residential roof or exterior wall, and 20–35 dB through reinforced concrete). For devices installed outdoors, in garages, or in utility rooms with exterior walls — which account for over 70% of U.S. residential battery installations according to Lawrence Berkeley National Laboratory survey data — reception reliability is high, consistent with the established operational record of Iridium SBD messaging in similar environments. For the minority of installations in electromagnetically challenging indoor locations, a low-cost passive patch antenna ($0.50–$2.00) routed to a window or exterior wall resolves the issue, analogously to the external antenna commonly used with FM receivers in vehicles and buildings.

Crucially, the architecture possesses an intrinsic tolerance for occasional reception failures that terrestrial unicast systems lack. As demonstrated in the main text (Result 3), even with 15% of devices offline — whether due to signal obstruction, hardware fault, or voluntary opt-out — the aggregate fleet response maintains an of 0.975 against the target dispatch curve. This statistical robustness is a direct consequence of the O(1) broadcast design: no individual device is critical, and the aggregator requires no knowledge of which specific devices received the signal. In contrast, an O(N) unicast system must detect, timeout, and retry each unreachable device individually, creating computational and latency costs that scale with the number of obstructed devices.

## G.8 Comparative Summary

Table S2 synthesises the analysis across all five dimensions. The scoring reflects the quantitative arguments developed in Sections G.3–G.7.

*Table S2. Multi-dimensional comparison of candidate broadcast physical layers for O(1) scheduling.*

| **Dimension** | **FM RDS Subcarrier** | **LoRa Class-C Multicast** | **DAB Data Channel** | **5G MBS** | **LEO Satellite Narrowband** |
| --- | --- | --- | --- | --- | --- |
| Per-device BOM cost | $0.80–1.50 | $1.50–2.50 | $2.50–5.00 | $15–40 | $1.00–2.00 (est.) |
| Per-device avg. power | ~15 μW | ~30 μW | ~50 μW | ~500 μW | ~5 μW |
| Infra. cost (1 city, annual) | $6k–36k | ~$160k | $10k–50k | Operator-dependent | $20k–80k |
| Infra. cost (50 cities, annual) | $300k–1.8M | ~$8M | $500k–2.5M | Operator-dependent | $20k–80k |
| Infra. scaling law | O(M) | O(M) | O(M) | O(M) | O(1) |
| Disaster resilience | Low (tower-dependent) | Medium (distributed but terrestrial) | Low (tower-dependent) | Low (base-station-dependent) | High (orbit-independent) |
| Regulatory complexity per new country | High (broadcast licence) | Medium (ISM band rules vary) | High (DAB multiplex licence) | High (operator agreement) | Zero (receive-only) |
| Indoor penetration | Excellent | Good | Good | Excellent | Moderate (mitigable) |
| Cross-border deployment speed | Slow (per-country negotiation) | Moderate (per-country adaptation) | Slow (per-country negotiation) | Slow (per-operator agreement) | Immediate (global footprint) |

## G.9 Conclusion

The comparison reveals that no single technology dominates across all dimensions. FM RDS offers the lowest entry cost and the best indoor penetration for a single-city pilot, making it a reasonable choice for initial proof-of-concept deployments. LoRa multicast provides flexibility in unlicensed spectrum but incurs the highest infrastructure cost at scale due to gateway network requirements. The LEO satellite narrowband link incurs a moderately higher fixed cost but exhibits a unique and decisive structural property: its infrastructure cost is independent of the number of cities served. Combined with its inherent disaster resilience and zero regulatory overhead at the receiver, the satellite link is the only candidate that preserves the O(1) scaling philosophy of the scheduling architecture at the physical layer. For these reasons, it serves as the reference implementation throughout this paper. We emphasise, however, that the architecture itself is carrier-agnostic, and practitioners may select the physical layer best suited to their specific deployment context using the framework provided in this section.

# Section H. Communication Cost Scaling: O(1) Broadcast versus O(N) Bidirectional Dispatch

## H.1 Scope and Purpose

The main text asserts that broadcast dispatch offers a structural communication cost advantage over bidirectional virtual power plant (VPP) architectures. This section provides the quantitative basis for that assertion. The analysis is deliberately limited to order-of-magnitude cost scaling rather than precise total-cost-of-ownership projections: input prices for satellite transponder leases, cellular IoT subscriptions, and platform software are market-dependent and evolving rapidly, but the O(1)-versus-O(N) scaling structure is invariant to price fluctuations.

The comparison covers only the communication cost of the real-time dispatch loop — the channel through which the dispatch centre issues control signals and (in the bidirectional case) receives device-level telemetry. It excludes costs that are common to both architectures: device hardware and installation, grid-side metering infrastructure, and settlement/billing systems. It also excludes the one-time cost of the satellite or cellular receiver module integrated into each device’s battery management system, which is analysed separately in Section G.3 (of order $1–$2 per device for the three leading candidates: FM, LoRa, and LEO satellite; see Section G.3).

## H.2 O(N) bidirectional VPP communication cost structure

In a conventional bidirectional VPP architecture, the aggregator maintains a persistent, individually addressable communication link to each enrolled device. The per-device communication cost comprises three components, all of which scale with the number of devices .

**Device-side cellular connectivity.** Each device requires a dedicated IoT SIM or embedded connectivity module to transmit state-of-charge, available capacity, and compliance acknowledgements to the aggregator platform, and to receive individualised dispatch commands in return. Commercial NB-IoT and LTE-M data plans for low-throughput utility applications are currently priced in the range of $1–$5 per device per month, depending on data volume, carrier, and region. At the low end, dedicated NB-IoT plans are available from as little as $0.50 per device per month (e.g., T-Mobile’s introductory NB-IoT plan at $6 per year, announced 2018; current pricing requires custom quotation), and 1NCE offers an IoT Lifetime Flat at $10–$14 for 10 years of connectivity. At the high end, LTE-M and 4G plans for higher-throughput applications reach $3–$5 per device per month. For the purpose of this analysis, we adopt a conservative mid-range estimate of = $2 per device per month, yielding an annual per-device communication cost of $24.

**Aggregator platform infrastructure.** The aggregator must operate a DER management system (DERMS) or equivalent software platform capable of ingesting telemetry from devices at the dispatch interval (typically every 5 minutes), executing optimisation algorithms over -dimensional state vectors, and issuing individual commands per dispatch cycle. Platform licensing, cloud compute, and data storage costs are difficult to estimate publicly — vendors (GE Vernova GridOS, Itron, Oracle Utilities DERMS, Uplight) provide custom enterprise pricing — but annual platform operating costs are generally of order $10⁵ for fleets of several thousand devices, growing sub-linearly but monotonically with . Vendors uniformly provide custom enterprise pricing rather than published rate cards, precluding a more precise public estimate.

**Cybersecurity and compliance.** Each bidirectional communication link expands the attack surface. The aggregator must maintain end-to-end encryption, intrusion detection, and regulatory compliance (e.g., NERC CIP in North America, GDPR in Europe for behavioural data) for individually addressable endpoints. Security audit and compliance costs scale at least linearly with and are non-trivial for fleets exceeding devices, though precise figures are highly jurisdiction-dependent.

The total annual communication cost for an O(N) bidirectional VPP can therefore be expressed as:

(S25)

where $24/year per device, and and are monotonically increasing functions of . For devices, the cellular connectivity component alone amounts to approximately $120,000 per year.

## H.3 O(1) broadcast communication cost structure

In the broadcast architecture proposed in this paper, the dispatch centre transmits a single scalar signal to all devices simultaneously via a unidirectional satellite downlink. There is no return channel within the dispatch loop, no per-device addressing, and no device-level telemetry.

**Satellite transponder lease.** The sole recurring communication cost is the lease of a narrowband time slot on a shared LEO transponder. The annual cost for continental-scale coverage is estimated at $20,000 to $80,000 (see Section G.4 for estimation methodology). This cost is entirely independent of : whether the coverage footprint contains 100 or 100,000 enrolled devices, the transponder lease remains the same.

**Ground station uplink.** The aggregator requires a single satellite earth station (or access to a shared teleport service) to upload the 64-bit signal frame every 5 minutes. Commercial teleport access for low-duty-cycle uplinks is estimated at $5,000–$15,000 per year (see Section G.4) — again independent of .

The total annual communication cost for the O(1) broadcast architecture is therefore:

(S26)

This is a fixed cost with zero dependence on . No platform is required to manage per-device state, and no cybersecurity infrastructure is needed for device-to-aggregator communication because no such communication exists.

## H.4 Cost crossover analysis

Setting and considering only the cellular connectivity component (the dominant O(N) term):

(S27)

(S28)

The numerical value of depends on the assumed per-device cellular cost. Using the mid-range satellite cost of $50,000 per year: at = $60/year (LTE-M at $5/month), ; at = $24/year ($2/month mid-range), ; at = $6/year (NB-IoT at $0.50/month), . Across this range, the crossover occurs at fleet sizes of — in all cases well below the – fleet sizes anticipated in urban deployments. Table S3 illustrates the cost divergence across representative fleet sizes using the mid-range estimate of = $24/year.

*Table S3. Annual dispatch-loop communication cost comparison (order-of-magnitude estimates).*

| **Fleet size** | **O(N) VPP (cellular only)** | **O(N) VPP (incl. platform)** | **O(1) Broadcast** |
| --- | --- | --- | --- |
| 100 | $2,400 | ~$10⁵ | $25,000–$95,000 |
| 1,000 | $24,000 | ~$10⁵ | $25,000–$95,000 |
| 5,000 | $120,000 | ~$2–6 × 10⁵ | $25,000–$95,000 |
| 50,000 | $1,200,000 | >$10⁶ | $25,000–$95,000 |

At , VPP cellular costs alone ($120,000) already exceed the broadcast budget ($25,000–$95,000) by 1.3–5×. At , the ratio exceeds 10×. When combined with the multi-city scaling advantage analysed in Section G.4 — where the satellite transponder lease covers cities at zero marginal cost — the cost divergence compounds multiplicatively: for an aggregator operating across cities with devices each, the broadcast communication budget remains fixed at $25,000–$95,000, while VPP cellular costs alone reach $1.2M, and total VPP communication costs (including platform infrastructure) are of order $2M–$6M.

## H.5 Beyond cost: structural implications of O(1) communication

The economic comparison presented above captures only the direct communication expenditure. Several structural consequences of O(1) information complexity are difficult to monetise but may dominate deployment decisions in practice:

**Elimination of the device state database.** A bidirectional VPP aggregator must maintain a real-time database of device states (state of charge, available capacity, connectivity status, firmware version), updated at the dispatch interval. This database is the single point of failure for the dispatch system and requires continuous backup, failover, and integrity verification. The broadcast architecture requires no such database — the aggregator’s only persistent state is the population-level response model, which is a function of aggregate (not individual) parameters.

**Removal of the O(N) cybersecurity attack surface.** Each bidirectional communication endpoint is a potential vector for cyberattack. Compromising a single device’s communication channel can, in principle, enable false data injection into the aggregator’s state estimation, manipulation of dispatch commands to individual devices, or lateral movement into the aggregator’s IT infrastructure. The broadcast architecture’s unidirectional, receive-only device interface eliminates this entire attack class: devices have no uplink capability and cannot be individually addressed or compromised through the dispatch channel.

**Instant scalability.** Adding a new device to the broadcast-controlled fleet requires no configuration change at the aggregator, no SIM provisioning, no firewall rule update, and no database entry. Any device that implements the local response protocol and can receive the satellite signal is automatically part of the statistical ensemble. This “zero-touch enrollment” property is particularly valuable in markets where distributed storage is being deployed at rates exceeding new installations per year.

## H.6 Limitations

The cost estimates presented here are based on publicly available commercial pricing as of 2024–2025 and should be interpreted as indicative of cost structure and scaling behaviour, not as precise financial projections. Cellular IoT costs are declining rapidly — NB-IoT module prices have fallen from $15–$20 to below $3 in recent years, and subscription costs continue to trend downward — and satellite narrowband costs may also decrease as new LEO constellations enter service. The qualitative conclusion — that broadcast communication cost is independent of fleet size while bidirectional communication cost grows linearly — is robust to these price trends, but the numerical crossover point will shift as input prices evolve. The analysis assumes a 5-minute dispatch interval; higher-frequency dispatch (e.g., 1-minute for frequency regulation) would increase the data throughput requirements for the bidirectional architecture more than for the broadcast architecture, widening the cost gap.
